# Supplementary material
Source: Springer Nature journal article supplement (https://www.springermedizin.de/resource/supplementary/12911_2013_794_MOESM6_ESM.pdf/9526654)
Supplement: MOESM6 [file 9526654]

## National Linkage System

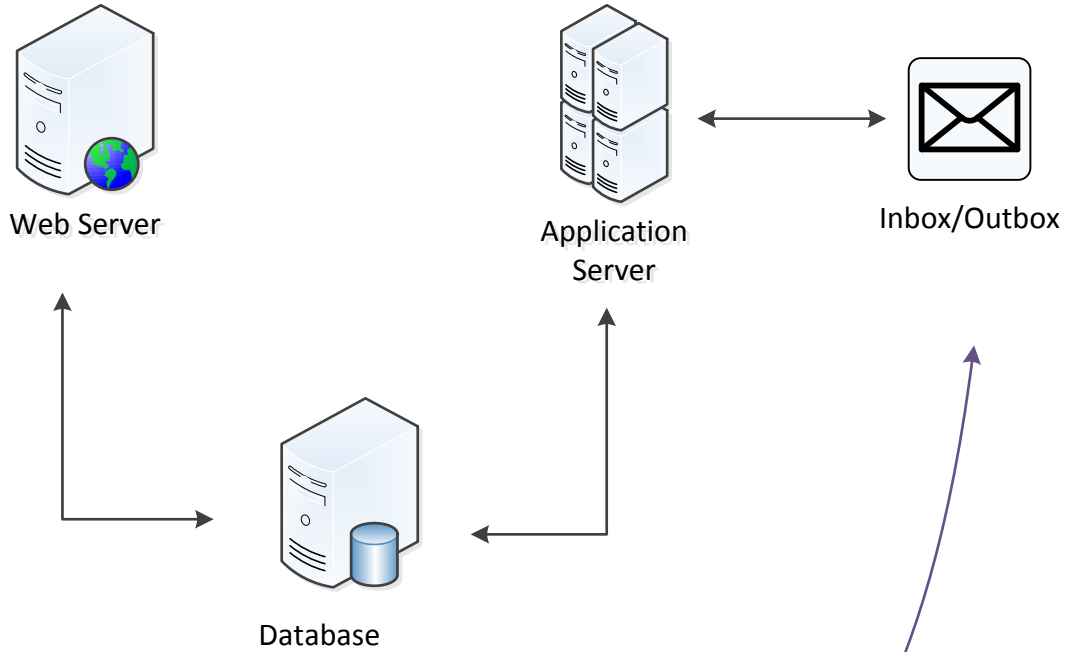

1. Operator connects to the database and get information on current groups

2. Operator uses this information outside the NLS to perform their own quality checks and programs.

3. The results of this process are fed back into the system as a Batch Quality review. Groups are adjusted based on these changes

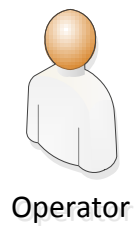

Own Quality Review Process
